# Supplementary material for: GPR43 stimulation on TCRαβ+ intraepithelial colonic lymphocytes inhibits the recruitment of encephalitogenic T-cells into the central nervous system and attenuates the development of autoimmunity
Source: PubMed Central journal article supplement (PMC10233874; doi:10.1186/s12974-023-02815-9), 2023-06-01
Supplement: 12974_2023_2815_MOESM1_ESM.pdf [file 12974_2023_2815_MOESM1_ESM.pdf]

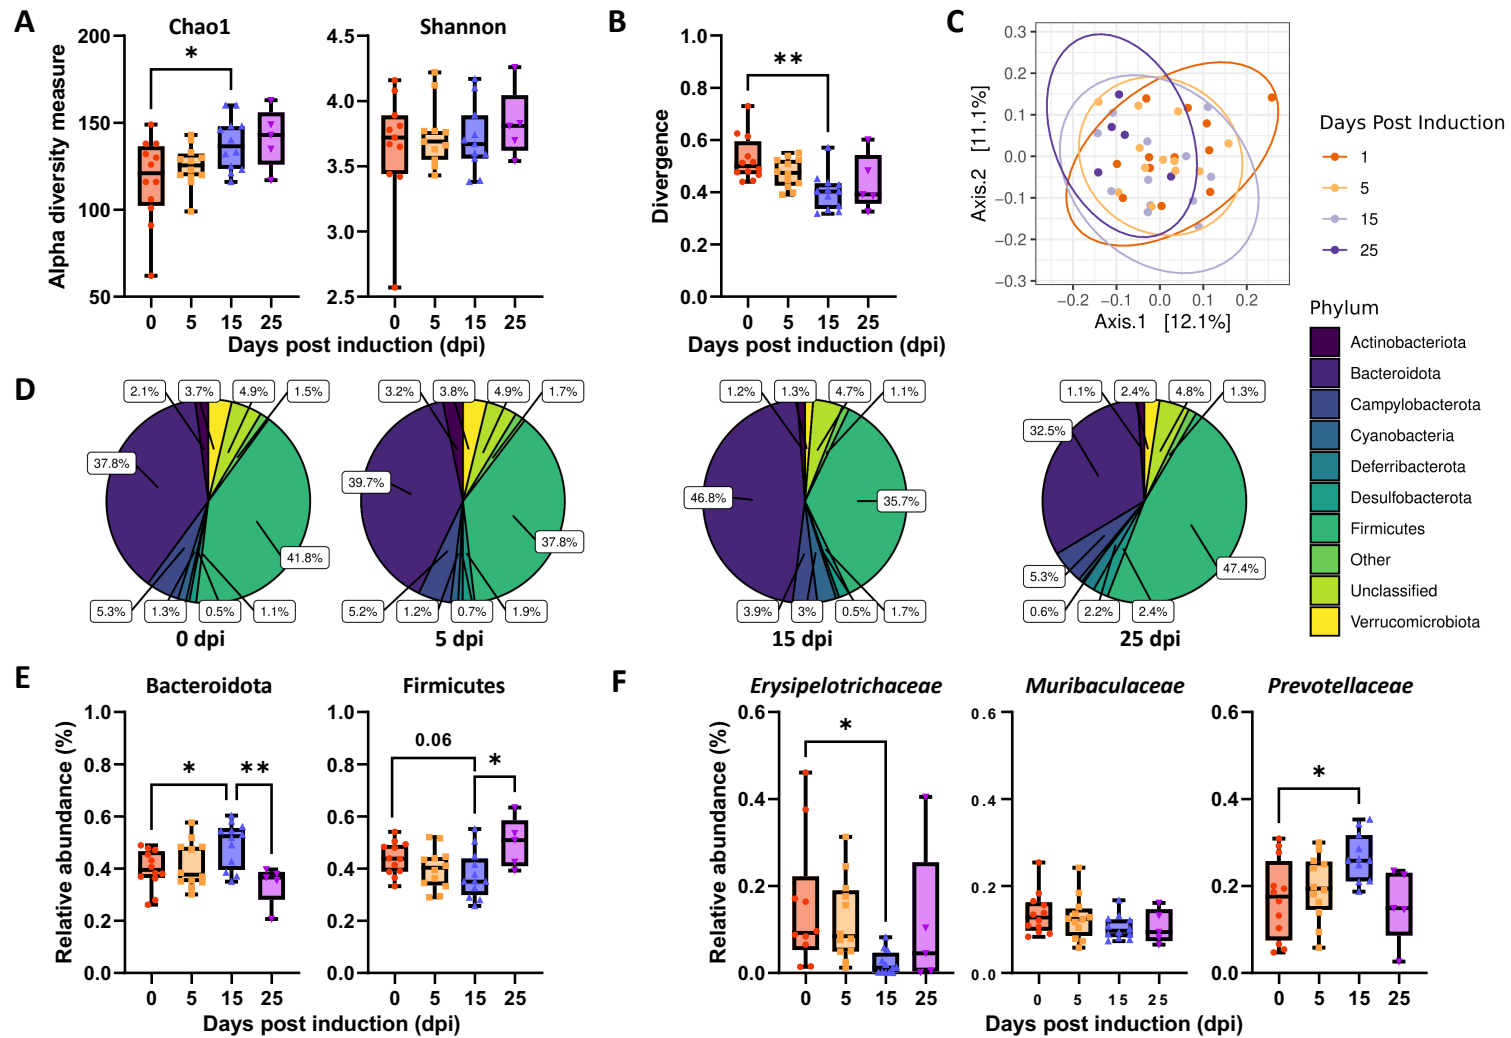

Figure S1

**A**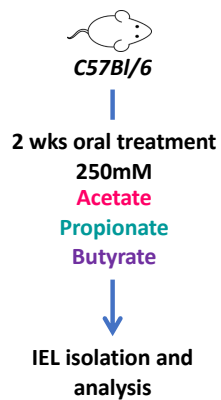**B**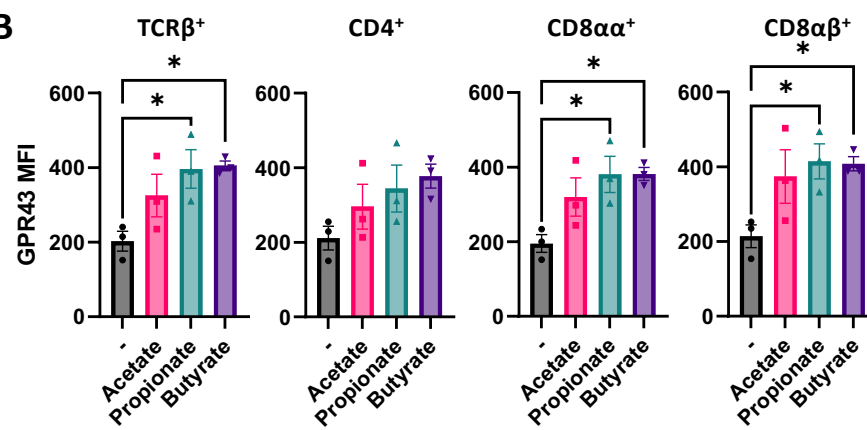**C**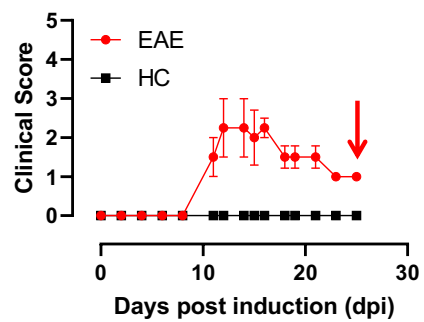**D**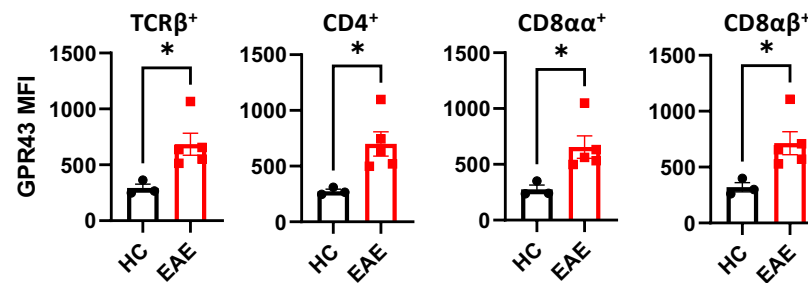**E**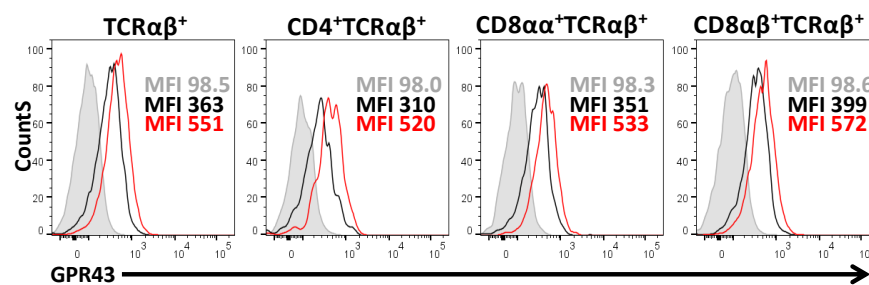

Figure S2

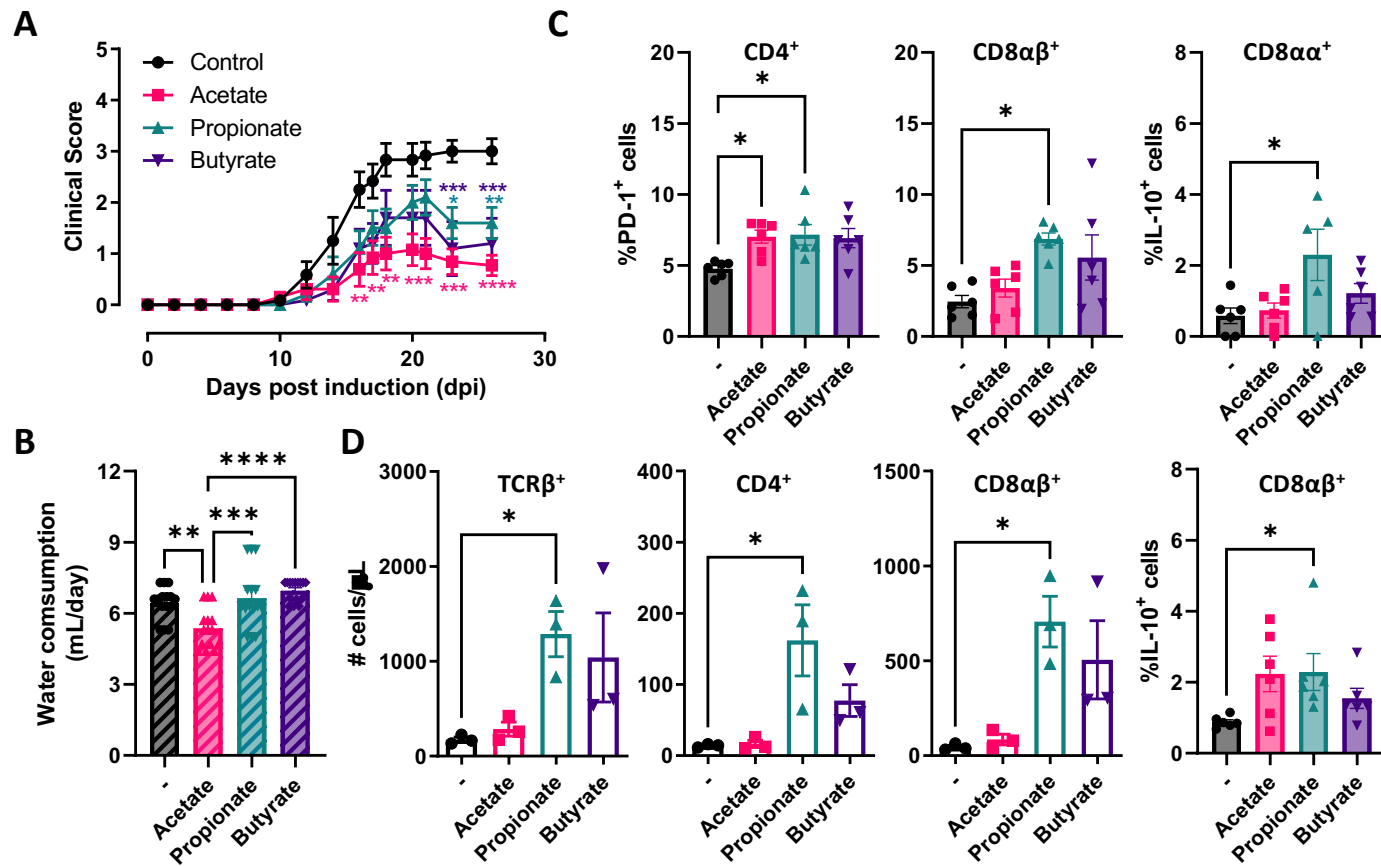

Figure S3

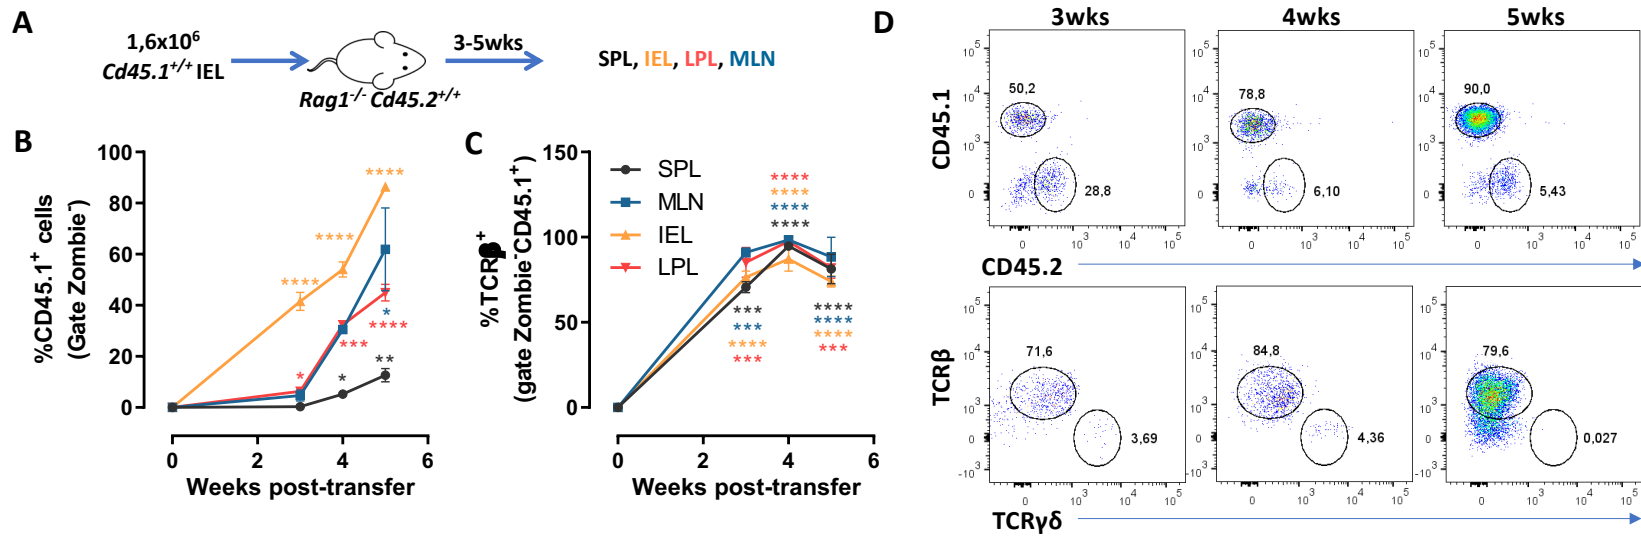

Figure S4

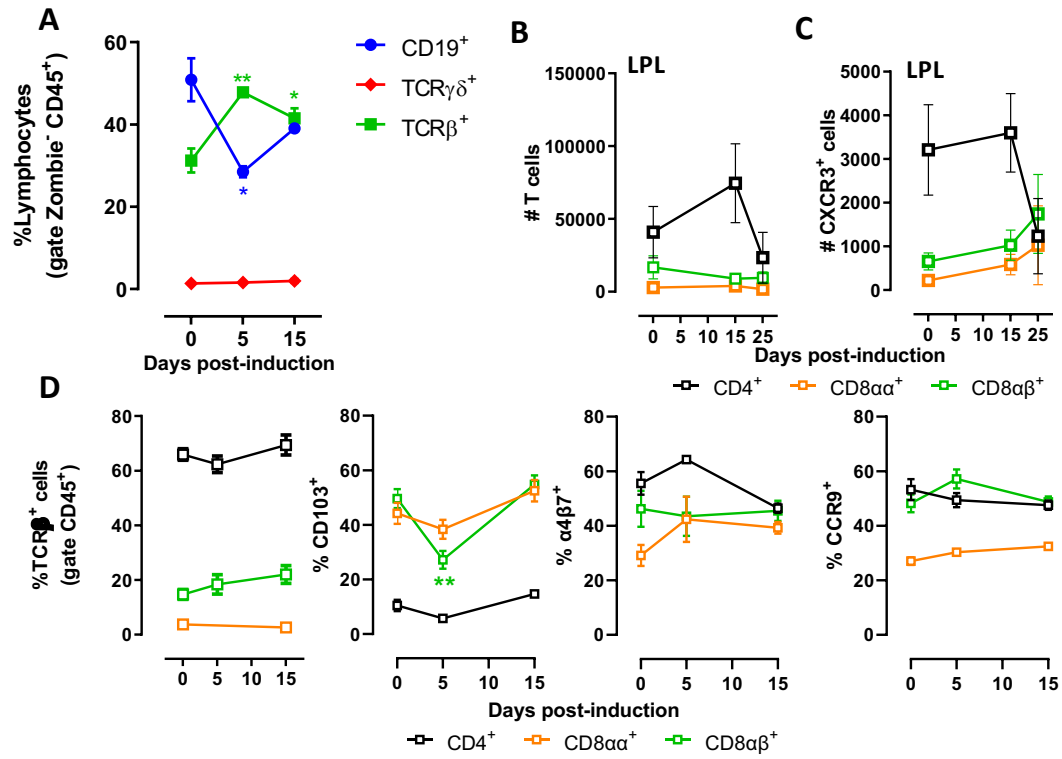

Figure S5
